# Supplementary material for: Investigating the interplay of hydrogen transfer, protolytic cracking, and dehydrogenation reactions over faujasite zeolites by using isooctane conversion as a probe
Source: Royal Society of Chemistry journal article supplement (doi:10.1039/d4cy00338a), 2024-01-01
Supplement: d4cy00338a1.pdf [file d4cy00338a1.pdf]

## Supporting Information

# Investigating the interplay of hydrogen transfer, protolytic cracking, and dehydrogenation reactions over faujasite zeolites by using isooctane conversion as a probe

Nabihan Abdul Rahman,<sup>a</sup> Nilson F. de Paula,<sup>a</sup> Phu Huy Nguyen,<sup>a</sup> Reda Bababrik,<sup>a,b</sup> Walter E. Alvarez,<sup>b</sup> Matt J. Wulfers,<sup>b</sup> Steven P. Crossley,<sup>a</sup> Daniel E. Resasco,<sup>a\*</sup>

- a) School of Sustainable Chemical, Biological and Materials Engineering, University of Oklahoma, Norman 73019 OK, USA.
- b) Phillips 66 Research Center, Bartlesville 74003 OK, USA.

---

\* Corresponding author: resasco@ou.edu

## S.1. Catalyst Characterization

### (A) IPA-TPD profiles.

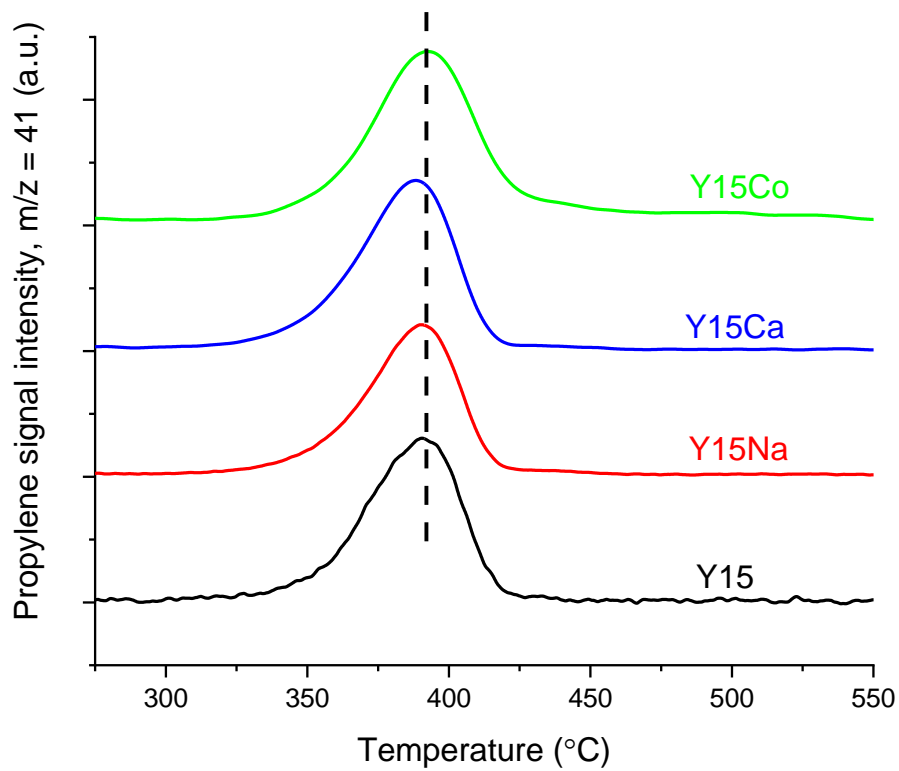

**Figure S1.** IPA-TPD profiles of Y15, Y15Na, Y15Ca, and Y15Co

**(B) XRD.** Powder X-ray diffraction (XRD) performed on a Rigaku Ultima IV diffractometer (Cu K $\alpha$  radiation,  $\lambda = 1.5406 \text{ \AA}$ ) in the  $2\theta$  range of  $5\text{--}70^\circ$  under an operating voltage of 40 kV and a current of 44 mA. Each sample was pretreated in a vacuum oven at  $80 \text{ }^\circ\text{C}$  to remove moisture.

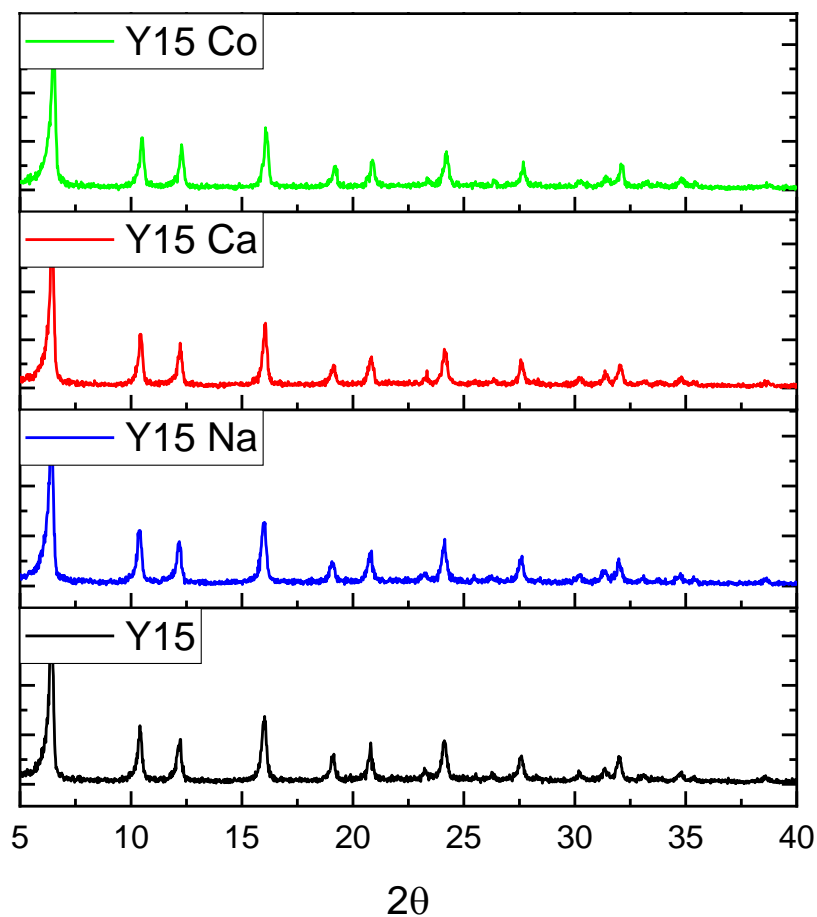

**Figure S2.** XRD patterns of Y15, Y15 Na, Y15 Ca, and Y15 Co

**(C) SEM.** The SEM images taken on a Thermo Fischer Quatro Environmental Scanning Electron Microscope (ESEM). The imaging was performed at 5kV accelerating voltage, 15,000x magnification, with an ETD detector.

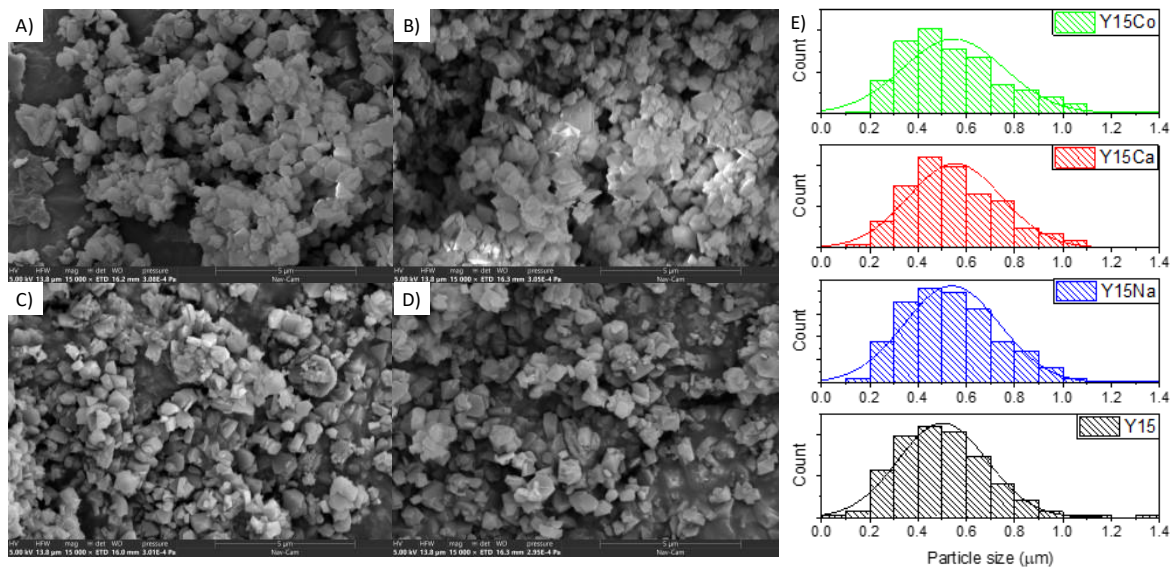

**Figure S3.** SEM images of Y15 (A), Y15 Na (B), Y15 Ca (C), Y15 Co (D), and the particle size distributions (E).

**(D) Pore volume.**

**Table S1.** Total pore volume, micropore volume, and mesopore volume of Y15, Y15Na, Y15Ca, and Y15Co.

|       | Pore volume (cm <sup>3</sup> /g) | Micropore volume (cm <sup>3</sup> /g) | Mesopore volume (cm <sup>3</sup> /g) |
|-------|----------------------------------|---------------------------------------|--------------------------------------|
| Y15   | 0.51                             | 0.29                                  | 0.22                                 |
| Y15Na | 0.48                             | 0.29                                  | 0.21                                 |
| Y15Ca | 0.49                             | 0.28                                  | 0.21                                 |
| Y15Co | 0.49                             | 0.28                                  | 0.21                                 |

## S.2. Catalytic measurements.

Catalytic reactions over the zeolites were evaluated in a fixed-bed quartz tube reactor operated in either flow or micropulse mode by using a 6-port valve with constant loop volume of 500  $\mu\text{L}$ . In flow-mode, a continuous and steady supply of reactants to the reactor was kept for a specified time on stream, whereas in micropulse mode, the 6-port valve set-up provides intermittent reactant injections to the reactor bed as the sample loop is filled with iso-octane vapor in  $\text{N}_2$ . The reactant was fed using a syringe pump (KDS100, KD scientific) and vaporized before entering the  $\text{N}_2$  stream (carrier gas) with the aid of heating tapes.

### (A) Iso-octane Cracking Product Distribution

**Table S2.** Product selectivity (mol%) iso-octane cracking over Y15 zeolite, as well as the Na-,Ca- tritreated Y15 at varying conversion. Reaction conditions: Pulse mode, 2.7 kPa partial pressure of iso-octane, 400 C, 1 atm

| Sample zeolite | Conversion (%) | Molar selectivity (%) |       |          |            |     |
|----------------|----------------|-----------------------|-------|----------|------------|-----|
|                |                | C1                    | C3=   | C4 (iC4) | C4= (iC4=) | C5+ |
| Y15            | 15             | 25                    | 25    | 13 (12)  | 34 (28)    | 3   |
|                | 13             | 24                    | 24    | 14 (14)  | 34 (28)    | 2   |
|                | 12             | 26                    | 26    | 12 (11)  | 34 (31)    | 2   |
|                | 12             | 27                    | 27    | 11 (11)  | 35 (32)    | 1   |
|                | 11             | 26                    | 26    | 12 (12)  | 34 (29)    | 2   |
|                | 10             | 25                    | 25    | 14 (13)  | 33 (31)    | 2   |
|                | 9              | 25                    | 25    | 13 (13)  | 34 (31)    | 2   |
|                | 3              | 30                    | 30    | 6 (6)    | 34 (28)    | 0   |
|                | 3              | 31                    | 31    | 7 (7)    | 34 (29)    | 0   |
|                | 3              | 30                    | 30    | 6 (6)    | 40 (33)    | 0   |
|                | 2              | 30                    | 30    | 6 (6)    | 38 (35)    | 0   |
|                | 2              | 30                    | 30    | 7 (7)    | 38 (32)    | 0   |
| 1              | 30             | 30                    | 7 (7) | 38 (31)  | 0          |     |
| Y15Na          | 16             | 28                    | 28    | 6 (6)    | 38 (31)    | 0   |
|                | 15             | 29                    | 29    | 7 (7)    | 38 (33)    | 0   |
|                | 15             | 29                    | 29    | 6 (6)    | 40 (37)    | 0   |
|                | 14             | 29                    | 29    | 6 (6)    | 34 (28)    | 0   |
|                | 13             | 29                    | 29    | 6 (6)    | 34 (28)    | 0   |
|                | 7              | 29                    | 29    | 6 (6)    | 34 (31)    | 0   |
|                | 7              | 23                    | 23    | 14 (14)  | 35 (32)    | 1   |
|                | 7              | 25                    | 25    | 11 (11)  | 38 (32)    | 0   |
|                | 6              | 24                    | 24    | 13 (12)  | 38 (36)    | 0   |

|       |   |    |    |         |         |   |
|-------|---|----|----|---------|---------|---|
|       | 5 | 25 | 25 | 12 (12) | 38 (34) | 0 |
|       | 4 | 26 | 26 | 11 (11) | 38 (31) | 0 |
|       | 1 | 25 | 25 | 12 (11) | 38 (33) | 0 |
|       | 1 | 14 | 14 | 28 (27) | 38 (34) | 5 |
|       | 1 | 17 | 17 | 24 (24) | 38 (36) | 4 |
|       | 1 | 18 | 18 | 23 (22) | 38 (35) | 4 |
|       | 1 | 19 | 19 | 20 (19) | 38 (32) | 4 |
|       | 1 | 20 | 20 | 20 (19) | 37 (34) | 4 |
| Y15Ca | 8 | 14 | 14 | 26 (24) | 42 (40) | 3 |
|       | 8 | 17 | 17 | 23 (22) | 40 (36) | 3 |
|       | 8 | 17 | 17 | 22 (22) | 40 (33) | 4 |
|       | 8 | 17 | 17 | 23 (22) | 39 (34) | 3 |
|       | 7 | 19 | 19 | 20 (19) | 39 (34) | 3 |
|       | 5 | 19 | 19 | 20 (19) | 39 (34) | 3 |
|       | 3 | 13 | 13 | 26 (25) | 45 (39) | 2 |
|       | 2 | 17 | 17 | 21 (21) | 43 (37) | 2 |
|       | 2 | 18 | 18 | 19 (18) | 42 (36) | 1 |
|       | 2 | 18 | 18 | 20 (19) | 42 (37) | 1 |
|       | 2 | 19 | 19 | 18 (17) | 42 (36) | 1 |
|       | 2 | 19 | 19 | 19 (18) | 42 (37) | 1 |

### (B) Isooctane cracking reaction conditions comparisons with literature

**Table S3.** Isooctane conversion and reaction conditions of this work and those in the literature.

|                                  | This work | Brillis and Manos <sup>20</sup> | Beirnaert et al. <sup>18</sup> | Van Borm et al. <sup>17</sup> |
|----------------------------------|-----------|---------------------------------|--------------------------------|-------------------------------|
| Reaction temperature (K)         | 673       | 523-623                         | 698-748                        | 748                           |
| Isooctane partial pressure (kPa) | 2.7       | 10-20                           | 6.8 – 15 kPa                   | 7                             |
| Isooctane conversion (%)         | 0.5-10    | >90                             | 10-55                          | 15                            |
| Coke deposited (wt%)             | -         | 10                              | 1.5-3.5                        | -                             |

### (C) Isobutane Cracking

**Table S4.** Product selectivity (mol%) and conversion of isobutane cracking over zeolite Y with varying Si/Al. Reaction conditions: 400°C, 50 mg, 3mL/min of reactant injected, 100 mL/min of N<sub>2</sub> inert flow. 1 atm. Pretreatment under N<sub>2</sub> at 300 °C for 2 hours.

|                 | Product Selectivity |        |        |
|-----------------|---------------------|--------|--------|
|                 | Y2.6                | Y15    | Y30    |
| C <sub>1</sub>  | 26%                 | 14%    | 19%    |
| C <sub>3=</sub> | 20%                 | 14%    | 19%    |
| C <sub>4=</sub> | 43%                 | 64%    | 58%    |
| C <sub>5</sub>  | 10%                 | 8%     | 5%     |
| Conversion      | 0.033%              | 0.040% | 0.020% |
| DH rate/PC rate | 1.9                 | 4.6    | 3.0    |

### (D) 2-methylhexane Cracking

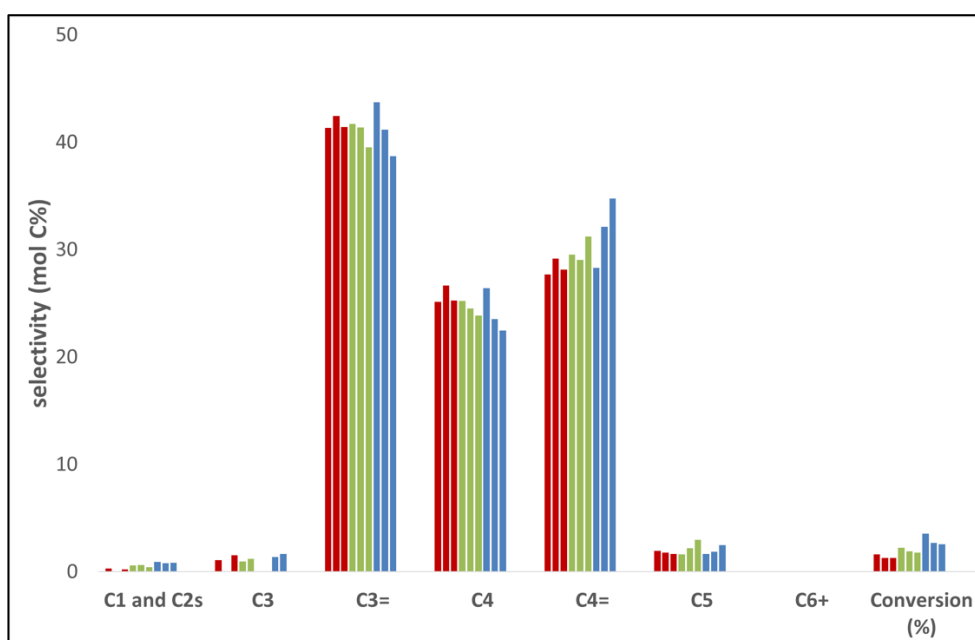

**Figure S4.** Products distribution and conversion of 2-methylhexane cracking over Y15 zeolite in flow mode. Red bars: 400 °C, green bars: 410 °C, blue bars: 420 °C. Subsequent bar of a given color represents various iC<sub>8</sub> feeding rate: 0.4, 0.6 and 0.8 mL/hr. Reaction conditions: 50 mg, 80 mL/min of He flow. Pretreatment under He flow at 300 °C for 2 hours.

### (E) 2,5-dimethylhexane cracking

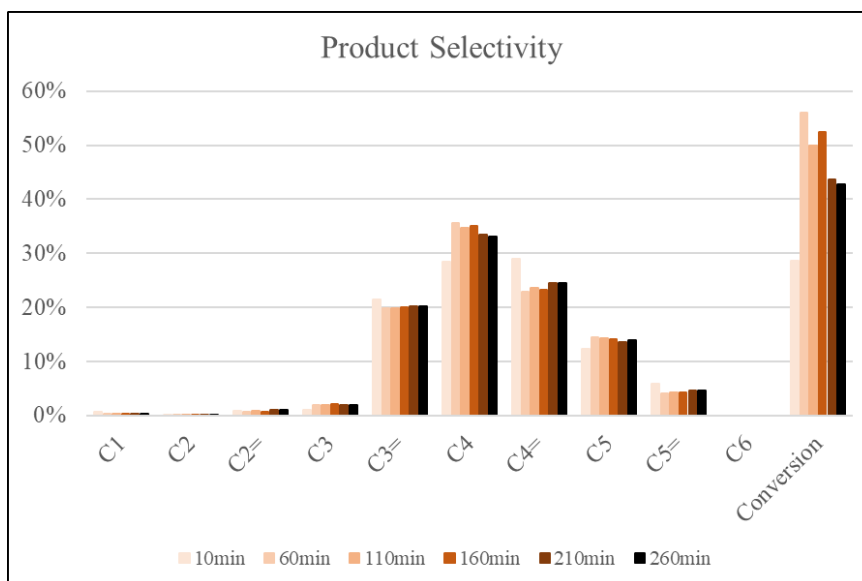

**Figure S5.** Product distribution (mol%) of 2,5-dimethylhexane catalytic cracking over zeolite Y15 in flow mode. Bar representation is relative to product distribution within progressing reactant time on stream. Reaction conditions: 400 °C, 50 mg, 0.5 mL of reactant injected per hour, 100 mL/min of N<sub>2</sub> inert flow. Pretreatment under N<sub>2</sub> at 300 °C for 2 hours.

### (F) Isooctane cracking at different partial pressures as a function of time on stream

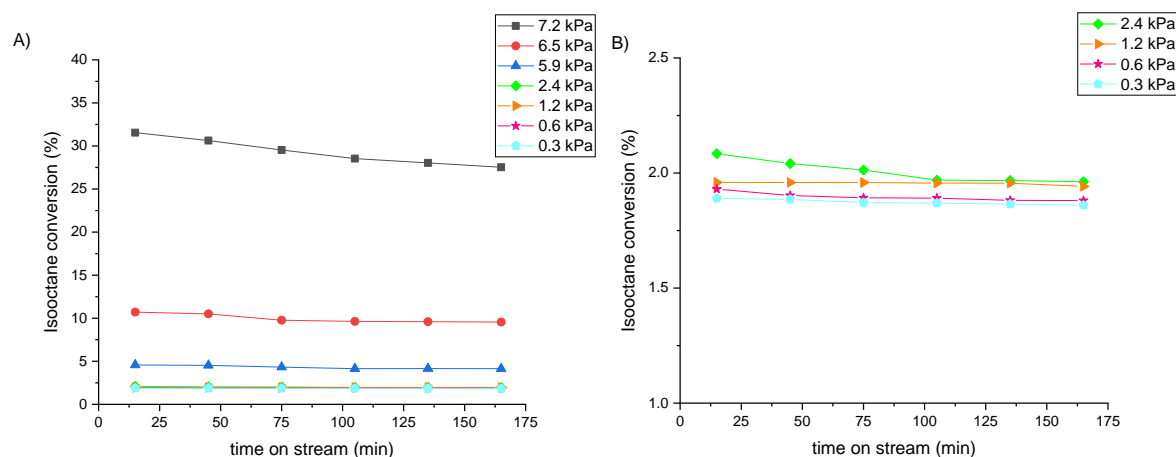

**Figure S6.** Isooctane conversion as a function of time on stream over LaY2.6 at A) varying isooctane partial pressure and B) first order partial pressure region. Reaction conditions: continuous flow reactor, 80 mL/min of carrier gas flow, 400°C, 1 atm, 50mg.



### S.3. Spent Catalysts Characterization

#### (A) TGA curves.

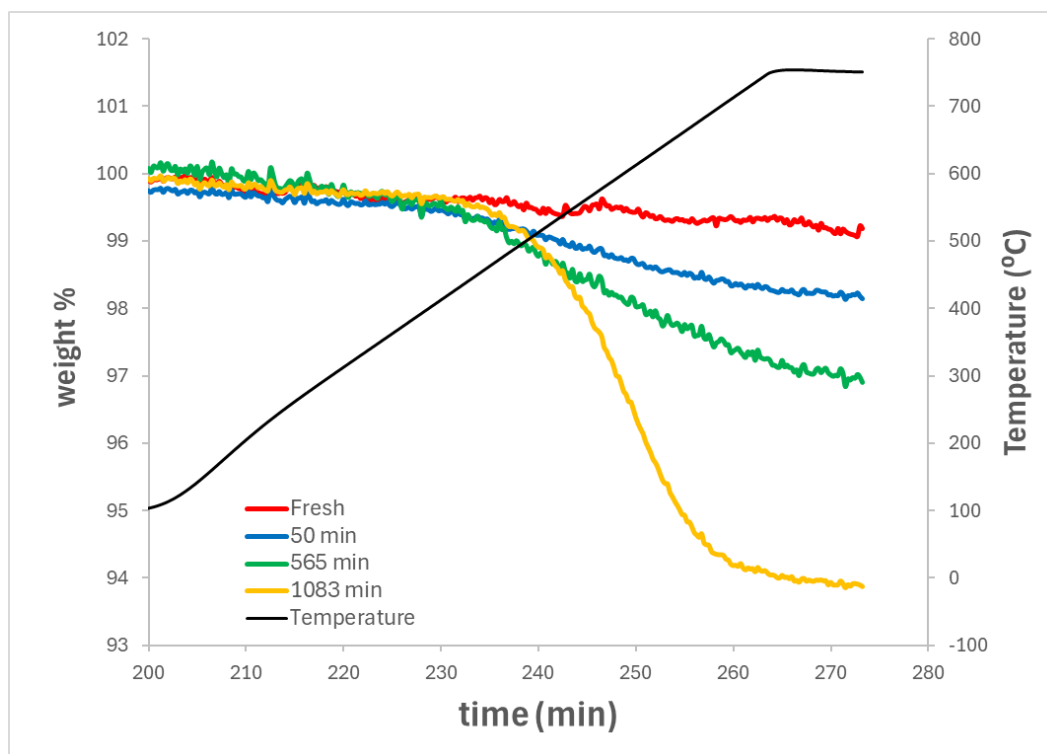

**Figure S7.** TGA curves of spent Y15Na at various time on stream. Reaction conditions: 5.5 mg catalyst, 400 °C, 0.87 kPa isooctane partial pressure, continuous flow mode.
